# Supplementary material for: Action Imagery and Observation in Neurorehabilitation for Parkinson’s Disease (ACTION-PD): development and pilot randomised controlled trial of a user-informed home training intervention to improve everyday functional actions
Source: bioRxiv or medRxiv preprint supplement (doi:10.1101/2020.07.14.188375), 2021-01-22
Supplement: Supplementary file [file media-2.pdf]

Supplement S2: Everyday actions included in pilot testing

| Action name and description                                                                                                                                                                 | Video duration (mm:ss) | Participants            |
|---------------------------------------------------------------------------------------------------------------------------------------------------------------------------------------------|------------------------|-------------------------|
| <u>Core actions</u>                                                                                                                                                                         |                        |                         |
| <i>Ticket sorting</i> : picking up a wallet from the table; opening the clasp; selecting and removing a train ticket; fastening the wallet; placing the ticket and wallet down on the table |                        | All Initial             |
| <i>Coin sorting</i> : picking out two coins from a selection held in the palm of the non-dominant hand; transferring the coins to the palm of the dominant hand                             |                        | All Initial             |
| <i>Water bottle</i> : unscrewing and removing the lid of a small water bottle; pouring water into a cup; replacing the lid; lifting the cup towards the mouth                               | 00:56                  | All RCT                 |
| <i>Sugar jar</i> : unscrewing and removing the lid of a jar, extracting a teaspoon of sugar; depositing the sugar into a teacup; placing the spoon down; replacing the lid                  | 00:49                  | All RCT                 |
| <u>Personal actions</u>                                                                                                                                                                     |                        |                         |
| <i>Buttoning</i> : fastening and then unfastening 3 buttons on a tabard                                                                                                                     | 01:01                  | All Initial; RCT3, RCT5 |
| <i>Food cutting</i> : using a knife and fork to cut 3 slices from a block of modelling clay shaped into a 'steak'                                                                           | 00:50                  | I1, I2                  |
| <i>Butter container</i> : removing the lid of a plastic butter container                                                                                                                    | 00:16                  | I2                      |
| <i>Breakfast cereal</i> : opening a cereal box; pouring cereal flakes into a bowl; re-closing the box                                                                                       | 00:34                  | I3                      |
| <i>Lock and key</i> : inserting a key into a padlock; turning the key to unlock the padlock; <i>removing the key</i>                                                                        | 00:34                  | I4, RCT5                |
| <i>Coffee jar</i> : unscrewing the lid of a large coffee jar; screwing the lid back on                                                                                                      | 00:48                  | I4                      |
| <i>Zippering</i> : fastening and then unfastening a zip on a jacket                                                                                                                         | 00:41                  | RCT1, RCT5              |
| <i>Writing - patterns</i> : using a pen to draw pre-writing patterns on lined paper; maintaining the amplitude of the letters between the lines; completing 3 rows of different patterns    | 00:52                  | I1, I3                  |
| <i>Writing- letters</i> : using a pen to write letters of the alphabet on lined paper; maintaining the amplitude of the letters between the lines; completing 3 rows of different patterns  | 03:32                  | RCT2, RCT3              |

| Action name and description                                                                                                                                                                                                  | Video duration (mm:ss) | Participants     |
|------------------------------------------------------------------------------------------------------------------------------------------------------------------------------------------------------------------------------|------------------------|------------------|
| <i>Newspaper</i> : turning two pages or a newspaper; turning back to the cover                                                                                                                                               | 00:45                  | RCT1, RCT2       |
| <i>Shirt sleeves</i> : fastening 3 buttons on a shirt sleeve cuff; repeating on other sleeve                                                                                                                                 | 00:54                  | RCT2, RCT3, RCT4 |
| <i>Ticket sorting</i> : picking up a wallet from the table; opening the clasp; selecting and removing a train ticket; fastening the wallet; placing the ticket and wallet down on the table                                  | 00:48                  | RCT6             |
| <i>Ticket removing</i> : holding a wallet in one hand and set of tickets in the other; selecting a ticket; opening the wallet; placing the other tickets in the wallet; closing the wallet while holding the selected ticket | 00:44                  | RCT6             |
| <i>Paper tidying</i> : gathering loose papers into a pile; picking up and straightening the papers; placing the pile back onto the table; picking up one sheet from the top                                                  | 00:48                  | RCT6             |
| <i>Coin jar</i> : unscrewing the lid of a small jar and placing it onto the table; picking up 4 individual coins and dropping them into the jar; screwing the lid back on                                                    | 01:03                  | RCT4             |
| <i>Yogurt pot</i> : removing the lid of a yogurt pot and placing it on the table; placing the lid back on                                                                                                                    | 00:37                  | RCT1             |
| <i>Food bag</i> : opening a zip-lock food bag; removing a cookie and placing it onto a plate; re-sealing the bag                                                                                                             | 00:44                  | RCT4             |

*Note: I = initial testing cohort; RCT = pilot RCT intervention group.*
