# Supplementary material for: Action Imagery and Observation in Neurorehabilitation for Parkinson’s Disease (ACTION-PD): development and pilot randomised controlled trial of a user-informed home training intervention to improve everyday functional actions
Source: bioRxiv or medRxiv preprint supplement (doi:10.1101/2020.07.14.188375), 2021-01-22
Supplement: Supplementary file [file media-4.pdf]

Supplement S4: Difficulty ratings and motor imagery ratings during home training

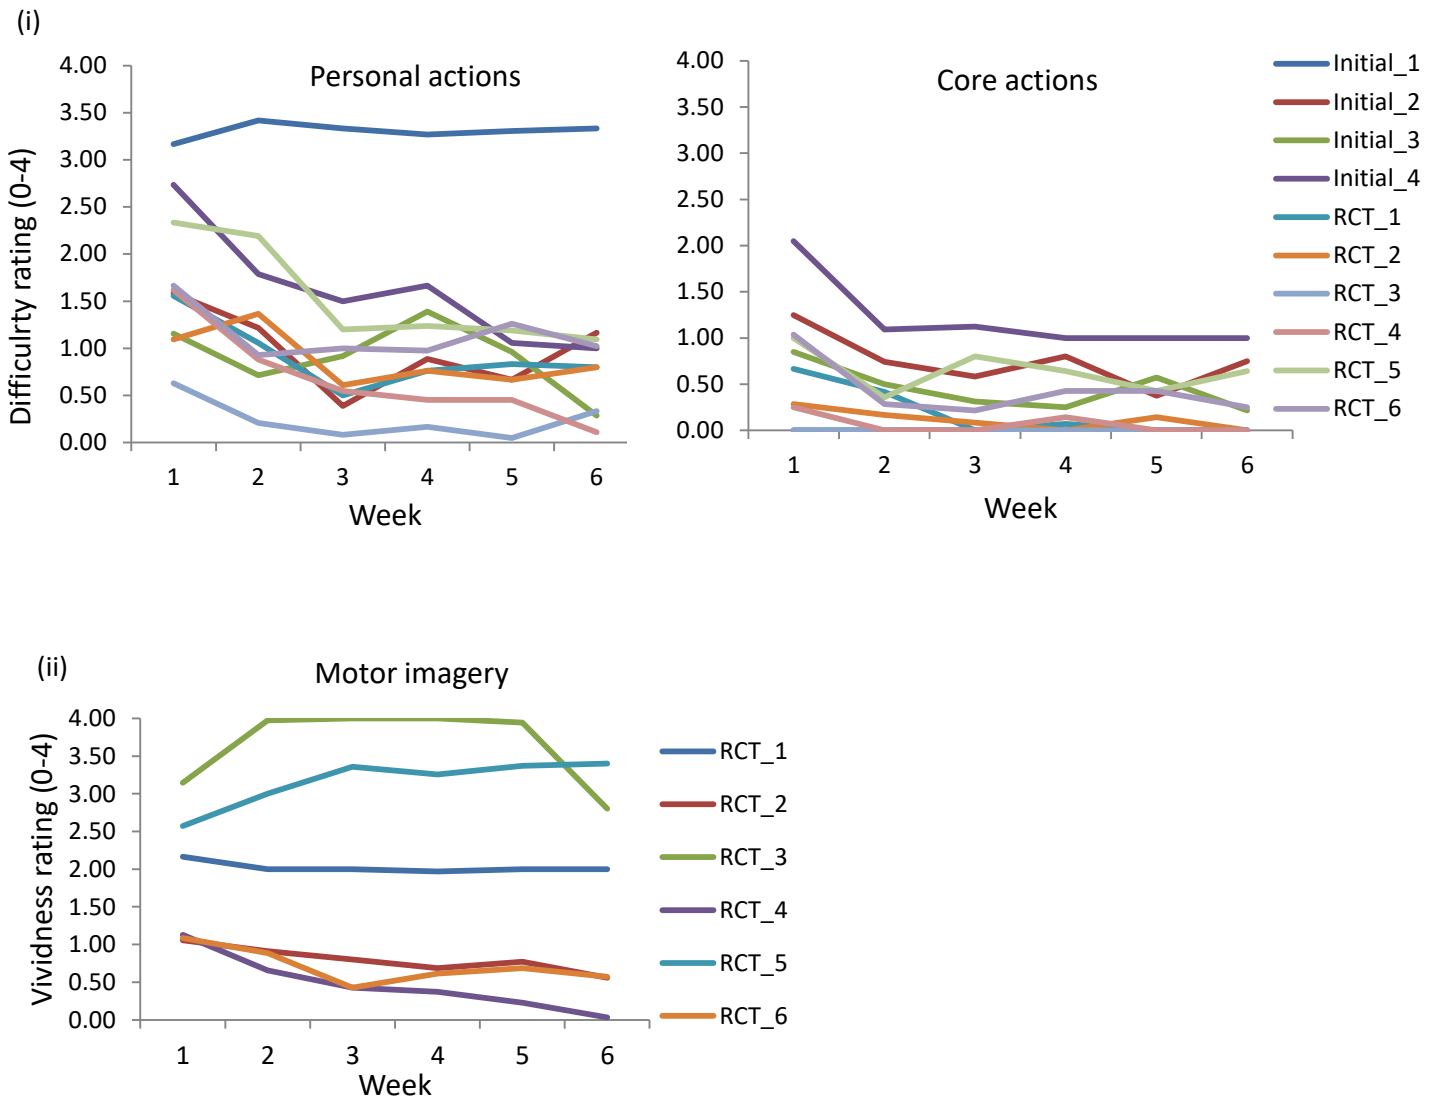

Figure S4. Average weekly ratings during the six-week intervention for (i) difficulty of personal and core actions in the initial testing and pilot RCT; (ii) motor imagery in the pilot RCT.
